# Supplementary material
Source: PubMed Central journal article supplement (PMC3769948)
Supplement: NIHMS509752-supplement-Supp__Data.pdf [file NIHMS509752-supplement-Supp__Data.pdf]

**SUPPLEMENTARY DATA****Therapeutic targeting malignant mesothelioma with a novel 6-substituted pyrrolo[2,3-*d*]pyrimidine thienoyl antifolate via its selective uptake by the proton-coupled folate transporter**

Christina Cherian, Sita Kugel Desmoulin, Lei Wang, Lisa Polin, Kathryn White, Juiwanna Kushner, Mark Stout, Zhanjun Hou, Aleem Gangjee, and Larry H. Matherly

Graduate Program in Cancer Biology, Wayne State University School of Medicine, Detroit, MI 48201 (SKD, LHM)

Department of Oncology, Wayne State University School of Medicine, Detroit, MI 48201 (CC, SKD, LP, KW, JK, ZH, LHM)

Molecular Therapeutics Program, Barbara Ann Karmanos Cancer Institute, Detroit, MI 48201 (CC, LP, ZH, LHM)

Department of Pharmacology, Wayne State University School of Medicine, Detroit, MI 48201 (LHM)

Department of Pediatrics, Children's Hospital of Michigan, Detroit, MI 48201 (MS)

Division of Medicinal Chemistry, Graduate School of Pharmaceutical Science, Duquesne University, Pittsburgh, PA 15282 (LW, AG)
